# Supplementary material
Source: publisher site journal article supplement (https://www.dovepress.com/article/270376)
Supplement: Supplementary file 1 [file get_supplementary_file.php]

# **Supplementary Material for**

# **Healthy sleepers can worsen their sleep by wanting to do so: The effects of willpower on objective and subjective sleep parameters**

Selina Ladina Combertaldi1 & Björn Rasch1*

1 University of Fribourg, Department of Psychology, Fribourg, Switzerland

Address correspondence to Björn Rasch, Division of Cognitive Biopsychology and Methods, Department of Psychology, University of Fribourg, Rue P.-A.-Faucigny 2, CH-1700 Fribourg, FR, Switzerland. Email: [bjoern.rasch@unifr.ch](mailto:bjoern.rasch@unifr.ch)

**Table S1.** Sleep Cycles for conditions

|  | Bad | Good | Neutral |
| --- | --- | --- | --- |
|  | M ± SEM | M ± SEM | M ± SEM | F-Test |
| ***Cycle 1*** | n = 22 |  |  |  |
| Duration | 90.59 ± 8.11 | 101.93 ± 10.41 | 98.92 ± 10.30 | 0.479 |
| N1 [%] | 9.72 ± 3.14 | 8.35 ± 1.83 | 11.59 ± 4.85 | 0.353 |
| N2 [%] | 29.60 ± 3.44 | 34.89 ± 3.13 | 31.12 ± 3.50 | 0.940 |
| N3 [%] | 42.87 ± 5.03 | 43.28 ± 4.98 | 46.90 ± 4.88 | 0.282 |
| REM [%] | 14.25 ± 2.85 | 11.12 ± 2.37 | 9.06 ± 1.06 | 1.682 |
| Wake [%] | 2.90 ± 1.10 | 2.03 ± 0.83 | 1.03 ± 0.33 | 1.787 |
| N1 [min] | 6.52 ± 1.28 | 7.57 ± 1.28 | 6.64 ± 1.42 | 0.290 |
| N2 [min] | 29.66 ± 4.79 | 36.41 ± 5.64 | 35.66 ± 6.76 | 0.571 |
| N3 [min] | 39.11 ± 4.75 | 44.11 ± 5.94 | 45.98 ± 4.96 | 0.619 |
| REM [min] | 12.25 ± 2.15 | 11.11 ± 2.59 | 9.02 ± 1.40 | 0.717 |
| Wake [min] | 2.32 ± 0.67 | 2.39 ± 0.90 | 1.09 ± 0.38 | 1.659 |
| ***Cycle 2*** | n = 22 |  |  |  |
| Duration | 101.73 ± 6.11 | 103.52 ± 6.76 | 103.64 ± 5.38 | 0.038 |
| N1 [%] | 4.36 ± 0.83 | 5.84 ± 0.73 | 5.77 ± 1.10 | 1.033 |
| N2 [%] | 37.22 ± 3.45 | 42.14 ± 3.40 | 41.81 ± 2.92 | 1.157 |
| N3 [%] | 36.46 ± 4.18 | 31.34 ± 4.26 | 30.73 ± 4.75 | 0.819 |
| REM [%] | 19.12 ± 1.97 | 19.18 ± 1.80 | 19.86 ± 1.71 | 0.071 |
| Wake [%] | 2.01 ± 0.63 | 0.91 ± 0.42 | 1.36 ± 0.81 | 0.857 |
| N1 [min] | 4.02 ± 0.60 | 6.34 ± 0.08 | 6.52 ± 1.53 | 1.939 |
| N2 [min] | 37.52 ± 3.64 | 44.32 ± 4.98 | 44.32 ± 4.19 | 1.216 |
| N3 [min] | 37.02 ± 5.00 | 31.43 ± 4.69 | 29.39 ± 4.50 | 1.140 |
| REM [min] | 20.18 ± 2.40 | 19.75 ± 2.12 | 21.11 ± 2.09 | 0.129 |
| Wake [min] | 2.16 ± 0.71 | 1.16 ± 0.66 | 1.77 ± 1.14 | 0.388 |
| ***Cycle 3*** | n = 22 |  |  |  |
| Duration | 102.05 ± 7.94 | 111.75 ± 6.09 | 113.93 ± 4.79 | 1.168 |
| N1 [%] | 10.86 ± 3.33 | 7.58 ± 0.97 | 7.16 ± 1.05 | 1.054 |
| N2 [%] | 43.03 ± 3.48 | 53.41 ± 2.21 | 49.30 ± 3.95 | 3.079 |
| N3 [%] | 19.00 ± 4.21 | 12.53 ± 2.18 | 16.54 ± 3.97 | 0.946 |
| REM [%] | 21.13 ± 2.22 | 22.20 ± 2.32 | 24.37 ± 2.22 | 0.635 |
| Wake [%] | 5.07 ± 1.54 | 3.79 ± 1.77 | 1.85 ± 0.61 | 1.377 |
| N1 [min] | 8.02 ± 1.70 | 8.48 ± 1.29 | 8.48 ± 1.42 | 0.038 |
| N2 [min] | 46.36 ± 5.12 | 59.36 ± 3.63 | 55.89 ± 4.67 | 3.068** |
| N3 [min] | 19.11 ± 4.05 | 12.55 ± 2.12 | 18.07 ± 4.10 | 1.178 |
| REM [min] | 22.86 ± 3.00 | 25.32 ± 3.13 | 28.34 ± 2.99 | 0.928 |
| Wake [min] | 4.70 ± 1.43 | 5.52 ± 2.94 | 2.30 ± 0.80 | 0.827 |
| ***Cycle 4*** | n = 15 |  |  |  |
| Duration | 100.97 ± 5.77 | 98.20 ± 7.93 | 97.43 ± 6.18 | 0.196 |
| N1 [%] | 8.26 ± 1.54 | 9.85 ± 2.05 | 7.19 ± 1.12 | 1.428 |
| N2 [%] | 50.65 ± 3.41 | 47.71 ± 4.75 | 51.95 ± 3.68 | 0.318 |
| N3 [%] | 6.60 ± 2.20 | 19.29 ± 5.15 | 15.00 ± 4.57 | 5.151** |
| REM [%] | 31.42 ± 3.18 | 21.67 ± 2.35 | 24.15 ± 2.44 | 3.141* |
| Wake [%] | 1.72 ± 0.69 | 0.67 ± 0.30 | 0.78 ± 0.52 | 1.114 |
| N1 [min] | 8.03 ± 1.69 | 8.23 ± 1.37 | 6.80 ± 1.03 | 0.645 |
| N2 [min] | 51.70 ± 3.99 | 44.76 ± 5.58 | 49.97 ± 4.15 | 1.032 |
| N3 [min] | 7.17 ± 2.52 | 20.87 ± 5.95 | 14.20 ± 3.74 | 5.844** |
| REM [min] | 31.03 ± 3.14 | 22.77 ± 3.05 | 24.57 ± 3.11 | 2.365 |
| Wake [min] | 1.60 ± 0.69 | 0.73 ± 0.34 | 1.00 ± 0.73 | 0.526 |
| ***Cycle 5*** | n = 5 |  |  |  |
| Duration | 85.75 ± 16.75 | 69.50 ± 24.50 | 78.25 ± 4.75 | 0.67 |
| N1 [%] | 8.32 ± 3.41 | 12.85 ± 2.71 | 6.84 ± 1.54 | 1.39 |
| N2 [%] | 55.30 ± 7.44 | 50.92 ± 5.91 | 55.05 ± 8.98 | 0.09 |
| N3 [%] | 16.22 ± 7.99 | 7.67 ± 5.36 | - | 1.95 |
| REM [%] | 18.02 ± 4.44 | 24.27 ± 3.29 | 37.03 ± 8.66 | 2.73 |
| Wake [%] | 1.21 ± 1.09 | 3.65 ± 2.46 | 0.30 ± 0.30 | 1.10 |
| N1 [min] | 7.10 ± 3.76 | 9.90 ± 2.52 | 5.70 ± 1.69 | 0.62 |
| N2 [min] | 41.20 ± 6.11 | 39.40 ± 6.22 | 41.60 ± 8.85 | 0.04 |
| N3 [min] | 11.70 ± 5.49 | 6.70 ± 4.47 | - | 4.55 |
| REM [min] | 14.30 ± 4.97 | 19.00 ± 3.14 | 28.40 ± 6.79 | 1.89 |
| Wake [min] | 1.10 ± 0.98 | 2.80 ± 1.71 | 0.30 ± 0.30 | 1.09 |

*Note*. Cycle analysis of sleep stages: Non-rapid eye movement (NREM)-sleep, stage 1, 2, and 3 sleep (N1, N2, N3), rapid eye movement sleep (REM), waketime after sleep onset (WASO), total sleep time (TST), sleep onset latency (SOL), slow wave sleep latency (SWS latency), REM sleep latency (REM latency) in minutes [min] and in parietal percentage of TST [%]. M and SEM are used to represent mean and standard error of means. * indicates p ≤ 0.05. ** indicates p ≤ 0.01 *** indicates p ≤ 0.001.

**Table S2**. Power bands during sleep

|  |  |  |  |  |
| --- | --- | --- | --- | --- |
|  |  | dfNum | dfDen | F |
| **Slow Oscillations (SO)** | **[0.5 - 1.5 Hz]** |  |  |  |
| NREM | Hemisphere | 1 | 15 | 4.62* |
|  | Topography | 1.15 | 17.26 | 49.23 |
|  | Condition | 1.66 | 24.93 | 0.39 |
|  | Topography x Hemisphere | 2.37 | 35.54 | 1.78 |
|  | Topography x Condition | 2.88 | 43.26 | 2.06 |
|  | Hemisphere x Condition | 1.46 | 21.88 | 0.46 |
|  | Topography x Hemisphere x Condition | 4.36 | 65.4 | 1.44 |
| REM | Hemisphere | 1 | 15 | 2.01 |
|  | Topography | 2.51 | 37.72 | 5.16** |
|  | Condition | 1.37 | 20.55 | 0.36 |
|  | Topography x Hemisphere | 1.63 | 24.47 | 1.79 |
|  | Topography x Condition | 2 | 30.05 | 2.01 |
|  | Hemisphere x Condition | 1.8 | 26.93 | 1.03 |
|  | Topography x Hemisphere x Condition | 2.24 | 33.54 | 1.44 |
| **Slow Wave Activity (SWA)** | **[0.5 - 4.5 Hz]** |  |  |  |
| NREM | Hemisphere | 1 | 15 | 3.47 |
|  | Topography | 1.15 | 17.2 | 47.53*** |
|  | Condition | 1.71 | 25.59 | 0.44 |
|  | Topography x Hemisphere | 2.48 | 37.19 | 2.35 |
|  | Topography x Condition | 2.98 | 44.68 | 2.1 |
|  | Hemisphere x Condition | 1.55 | 23.2 | 0.68 |
|  | Topography x Hemisphere x Condition | 4.29 | 64.32 | 1.45 |
| REM | Hemisphere | 1 | 15 | 0.51 |
|  | Topography | 2.37 | 35.48 | 4.05* |
|  | Condition | 1.82 | 27.34 | 0.26 |
|  | Topography x Hemisphere | 1.65 | 24.75 | 1.9 |
|  | Topography x Condition | 1.88 | 28.14 | 2.05 |
|  | Hemisphere x Condition | 1.8 | 26.95 | 1.67 |
|  | Topography x Hemisphere x Condition | 1.93 | 28.9 | 1.31 |
| **Delta** | **[1.5 - 4.5 Hz]** |  |  |  |
| NREM | Hemisphere | 1 | 15 | 0.53 |
|  | Topography | 1.24 | 18.55 | 36.34*** |
|  | Condition | 1.95 | 29.25 | 0.57 |
|  | Topography x Hemisphere | 2.66 | 39.92 | 3.45* |
|  | Topography x Condition | 3.16 | 47.37 | 2.12 |
|  | Hemisphere x Condition | 1.87 | 28.09 | 1.3 |
|  | Topography x Hemisphere x Condition | 3.22 | 48.29 | 1.18 |
| REM | Hemisphere | 1 | 15 | 0.28 |
|  | Topography | 1.45 | 21.73 | 2.55 |
|  | Condition | 1.52 | 22.77 | 0.28 |
|  | Topography x Hemisphere | 1.23 | 18.43 | 1.43 |
|  | Topography x Condition | 1.24 | 18.54 | 1.58 |
|  | Hemisphere x Condition | 1.22 | 18.34 | 1.88 |
|  | Topography x Hemisphere x Condition | 1.24 | 18.53 | 1.06 |
| **Theta** | **[4.5 - 8 Hz]** |  |  |  |
| NREM | Hemisphere | 1 | 15 | 0.1 |
|  | Topography | 2.06 | 30.87 | 16.14*** |
|  | Condition | 1.39 | 20.81 | 0.31 |
|  | Topography x Hemisphere | 1.42 | 21.32 | 2.16 |
|  | Topography x Condition | 1.63 | 24.48 | 1.37 |
|  | Hemisphere x Condition | 1.22 | 18.23 | 1.4 |
|  | Topography x Hemisphere x Condition | 1.28 | 19.24 | 1.46 |
| REM | Hemisphere | 1 | 15 | 1.01 |
|  | Topography | 1.15 | 17.19 | 1.5 |
|  | Condition | 1.21 | 18.13 | 0.36 |
|  | Topography x Hemisphere | 1.11 | 16.63 | 1.1 |
|  | Topography x Condition | 1.07 | 16.02 | 1.19 |
|  | Hemisphere x Condition | 1.05 | 15.81 | 1.62 |
|  | Topography x Hemisphere x Condition | 1.1 | 16.44 | 1.04 |
| **Alpha** | **[8 - 11 Hz]** |  |  |  |
| NREM | Hemisphere | 1 | 15 | 0.25 |
|  | Topography | 1.91 | 28.68 | 28.21*** |
|  | Condition | 1.88 | 28.19 | 0.51 |
|  | Topography x Hemisphere | 2.19 | 32.9 | 3.12 |
|  | Topography x Condition | 3.04 | 45.6 | 1.27 |
|  | Hemisphere x Condition | 1.93 | 28.94 | 2.07 |
|  | Topography x Hemisphere x Condition | 2.5 | 37.54 | 2.5 |
| REM | Hemisphere | 1 | 15 | 2.85 |
|  | Topography | 1.99 | 29.87 | 3.65* |
|  | Condition | 1.76 | 26.42 | 0.44 |
|  | Topography x Hemisphere | 1.45 | 21.81 | 1.39 |
|  | Topography x Condition | 1.49 | 22.32 | 1.05 |
|  | Hemisphere x Condition | 1.18 | 17.74 | 1.16 |
|  | Topography x Hemisphere x Condition | 1.3 | 19.46 | 1.93 |
| **Sigma** | **[11 - 15 Hz]** |  |  |  |
| NREM | Hemisphere | 1 | 15 | 0.29 |
|  | Topography | 2.03 | 30.44 | 59.63*** |
|  | Condition | 1.36 | 20.47 | 0.98 |
|  | Topography x Hemisphere | 2.3 | 34.55 | 3.96* |
|  | Topography x Condition | 3.21 | 48.17 | 1.21 |
|  | Hemisphere x Condition | 1.97 | 29.62 | 1.9 |
|  | Topography x Hemisphere x Condition | 2.28 | 34.19 | 2.29 |
| REM | Hemisphere | 1 | 15 | 0.58 |
|  | Topography | 1.76 | 26.33 | 2.21 |
|  | Condition | 1.96 | 29.47 | 0.36 |
|  | Topography x Hemisphere | 1.46 | 21.86 | 1.32 |
|  | Topography x Condition | 1.35 | 20.2 | 1.4 |
|  | Hemisphere x Condition | 1.25 | 18.8 | 0.69 |
|  | Topography x Hemisphere x Condition | 1.29 | 19.4 | 1.43 |
| **Beta** | **[15 - 30 Hz]** |  |  |  |
| NREM | Hemisphere | 1 | 15 | 3.05 |
|  | Topography | 2.46 | 36.94 | 24.49*** |
|  | Condition | 1.8 | 27.01 | 0.78 |
|  | Topography x Hemisphere | 2.29 | 34.31 | 2.79 |
|  | Topography x Condition | 2.91 | 43.58 | 1.41 |
|  | Hemisphere x Condition | 1.98 | 29.69 | 0.2 |
|  | Topography x Hemisphere x Condition | 2.22 | 33.28 | 1.63 |
| REM | Hemisphere | 1 | 15 | 0.12 |
|  | Topography | 2.18 | 32.74 | 6.85** |
|  | Condition | 1.89 | 28.31 | 1.26 |
|  | Topography x Hemisphere | 2.16 | 32.44 | 0.72 |
|  | Topography x Condition | 3.15 | 47.31 | 0.82 |
|  | Hemisphere x Condition | 1.97 | 29.62 | 0.11 |
|  | Topography x Hemisphere x Condition | 3.06 | 45.85 | 1.59 |

*Note*. Poweranalysis for non-rapid eye movement (NREM)-sleep (N2 + N3) and rapid eye movement sleep (REM). As factors Hemisphere (left vs. right), topography (frontal, central, parietal), and condition (“bad”, “good”, “neutral”) were used. M and SEM are used to represent mean and standard error of means. * indicates p < 0.05. ** indicates p < 0.01. ** indicates p < 0.001.
